# Supplementary material for: Validation of a Proprietary Deterioration Index Model and Performance in Hospitalized Adults
Source: PubMed Central journal article supplement (PMC10366696; doi:10.1001/jamanetworkopen.2023.24176), 2023-07-24
Supplement: jamanetwopen-e2324176-s002.pdf [file jamanetwopen-e2324176-s002.pdf]

## Data Sharing Statement

Byrd, IV. Validation of a Proprietary Deterioration Index Model and Performance in Hospitalized Adults. *JAMA Netw Open*. Published July 24, 2023. doi:10.1001/jamanetworkopen.2023.24176

### Data

**Data available:** No

### Additional Information

**Explanation for why data not available:** Protected health information
